# Supplementary material for: SETDB1 Overexpression Sets an Intertumoral Transcriptomic Divergence in Non-small Cell Lung Carcinoma
Source: Front Genet. 2020 Dec 2;11:573515. doi: 10.3389/fgene.2020.573515 (PMC7738479; doi:10.3389/fgene.2020.573515)
Supplement: Supplementary file 2 [file Table_1.XLSX]

## Sheet: Sheet1
*** Primer information
Gene Name	Forward (5' to 3')	Reverse (5' to 3')
GAPDH	GGAAGGTGAAGGTCGGAGTC	GTTGAGGTCAATGAAGGGGTC
SETDB1	CTCCCAAGTCTTTTTCAGTG	CAAAAACAAGCTCAGGTTTC
CHGB	CTATGATTCTGAGGAGCCGGT	ATTGCAGCCAAGTTTTCGAG
LARGE2	GGCAACCTCTGGAAGAACCA	CCTCCACATCTGCTCCCA
HMGB3	GACCAGCTAAGGGAGGCAAG	TTGTGGATTTGATCTTGGGG
CHRNA5	GAACCCTGATGACTATGGTGGA	CCCTTCAAAACGTCCATCTG
