# Supplementary material for: SETDB1 Overexpression Sets an Intertumoral Transcriptomic Divergence in Non-small Cell Lung Carcinoma
Source: Front Genet. 2020 Dec 2;11:573515. doi: 10.3389/fgene.2020.573515 (PMC7738479; doi:10.3389/fgene.2020.573515)
Supplement: Supplementary file 6 [file Table_5.XLSX]

## Sheet: -
*** Expression levels of epidriver genes
category	gene ID	entrez ID	ADC_high	ADC_low	SCC_high	SCC_low	normal	sd_ADC_high	sd_ADC_low	sd_SCC_high	sd_SCC_low	sd_Normal	FC_ADC_high/normal	FC_ADC_low/normal	FC_SCC_high/normal	FC_SCC_low/normal
acetyl	CREBBP	1387	6086.94	4852.96	6387.59	5015.96	6079.56	2229.04	1813.3	2351.52	2142.16	1503.65	1.00121	0.798242	1.05067	0.825053
acetyl	EP300	2033	5412.97	4604.56	6982.02	5800.26	6124.98	1749.82	1996.2	2359.69	2475.89	1548.33	0.883753	0.751767	1.13993	0.946984
acetyl	KANSL1	284058	3698.55	2872.81	3717.78	2536.88	2862.3	1881.69	1537.82	1142.88	790.18	621.14	1.29216	1.00367	1.29888	0.886308
acetyl	KAT14	57325	825.41	767.84	1205.63	965.15	746.42	355.15	265.54	742.81	449.77	165.27	1.10583	1.0287	1.61522	1.29304
acetyl	KAT2A	2648	4042.14	2634.07	4290.95	3146.71	1159.11	2196.26	1306.89	1653.9	1486.63	396.5	3.48728	2.27249	3.70194	2.71476
acetyl	KAT2B	8850	872.59	1258.75	640.26	871.5	2487.09	464.61	629.71	318.23	453.54	545.24	0.350848	0.506114	0.257433	0.35041
acetyl	KAT5	10524	1526.59	1494.49	1558.17	1591.39	1911.67	436.28	489.51	486.45	478.79	225.31	0.798564	0.781772	0.815083	0.832461
acetyl	KAT6A	7994	3798.04	2823.53	4204.69	4025.18	4265.48	2695.19	1920.96	1971.31	4031.95	1300.65	0.890413	0.661949	0.985748	0.943664
acetyl	KAT6B	23522	1834.97	1336.09	2149.91	1494.41	2369.42	757.57	747.55	883.81	630.48	681.32	0.774438	0.563889	0.907357	0.630707
acetyl	KAT7	11143	2988.23	2218.79	3049.15	2307.88	2316.72	1078.88	735.9	959.12	877.72	411.1	1.28985	0.957729	1.31615	0.996184
acetyl	KAT8	84148	2109.49	1964.04	1762.55	1496.43	1987.13	854.45	917.25	771	420.99	276.79	1.06158	0.98838	0.886983	0.753061
Deacetyl	HDAC1	3065	6817.49	6622.41	8566.22	10566.6	4044.93	2568.78	2137.51	4019.37	3608.43	566.93	1.68544	1.63721	2.11777	2.6123
Deacetyl	HDAC10	83933	447.78	412.4	510.3	515.05	281.14	244.9	235.5	263.21	302.22	101.82	1.59273	1.46688	1.81511	1.83201
Deacetyl	HDAC11	79885	1109.22	1286.4	686.23	900.18	1322.58	544.16	710.75	297.27	565.2	336.11	0.838679	0.972644	0.518857	0.680624
Deacetyl	HDAC11-AS1	100874101	2.44	2.09	2.05	2.39	0.99	2.75	2.48	2.01	2.61	1.2	2.46465	2.11111	2.07071	2.41414
Deacetyl	HDAC2	3066	5384.42	4671.17	7991.74	7136.69	3241.26	3073.75	1833.46	3850.18	2620.89	370.76	1.66121	1.44116	2.46563	2.20183
Deacetyl	HDAC2-AS2	101927768	58.48	59.61	50.53	45.9	36.96	86.89	95.88	48.79	80.15	10.98	1.58225	1.61282	1.36715	1.24188
Deacetyl	HDAC3	8841	2590.09	3057.66	2912.52	3153.53	2233.75	804.62	1063.4	931.2	856.02	311.09	1.15953	1.36885	1.30387	1.41176
Deacetyl	HDAC4	9759	986.67	747.27	1492.74	1080.75	1216.73	530.65	294.09	882.25	474.25	293.55	0.810919	0.614163	1.22685	0.888241
Deacetyl	HDAC4-AS1	101928111	20.91	20.57	19.92	21.87	19.96	21.66	17.92	15.04	18.19	11.43	1.0476	1.03056	0.997996	1.09569
Deacetyl	HDAC5	10014	3471.9	2868.98	3141.68	2570.76	4109.4	1628.67	975.47	1364.74	1276.63	907.56	0.844868	0.698151	0.764511	0.62558
Deacetyl	HDAC6	10013	3124.64	2347.05	2668.86	2081.54	2577.42	1358.31	788.17	1194.71	831.26	408.32	1.21231	0.91062	1.03548	0.807606
Deacetyl	HDAC7	51564	5090.04	4546.69	4110.5	4018.03	6644.1	2123.03	1626.13	2004.05	2061.72	1613.15	0.766099	0.68432	0.618669	0.604752
Deacetyl	HDAC8	55869	1008.77	931.53	912.04	771.68	732.38	309.73	263.57	288.43	196.36	87.9	1.37739	1.27192	1.24531	1.05366
Deacetyl	HDAC9	9734	679.25	900.53	1122.32	967.71	542.65	1009.93	903.42	5201.66	1901.34	296.08	1.25173	1.6595	2.06822	1.7833
Deacetyl	SIRT1	23411	1740.51	1286.42	1087.58	945.08	1605.77	903.61	457.56	399.72	280.96	345.19	1.08391	0.801123	0.677295	0.588553
Deacetyl	SIRT2	22933	2273.42	2958.74	3251.42	3343.94	3097.26	1110.38	1930.06	1918.98	1486.04	469.38	0.73401	0.955277	1.04977	1.07964
Deacetyl	SIRT3	23410	1164.7	1117.33	939.07	846.44	1048.04	474.66	408.61	354.82	332.05	153.76	1.11131	1.06611	0.896025	0.807641
Deacetyl	SIRT4	23409	85.36	67.85	47.48	44.35	61.33	48.71	51.02	28.67	26.37	29.78	1.39181	1.10631	0.774173	0.723137
Deacetyl	SIRT5	23408	905.31	811.95	1135.97	983.29	735.23	321.72	245.96	471.48	478.95	142.18	1.23133	1.10435	1.54505	1.33739
Deacetyl	SIRT6	51548	823.72	958.23	913.2	933.71	674.67	358.33	387.08	325	318.71	145.17	1.22092	1.42029	1.35355	1.38395
Deacetyl	SIRT7	51547	1764.34	1549.65	1546.49	1525.8	843.95	735.99	782.86	703.31	598.73	197.76	2.09057	1.83619	1.83244	1.80793
DNA meth	DNMT1	1786	5027.19	3995.59	7298.49	5164.41	3038.73	2835.5	1968.66	3541.71	2661.54	813.72	1.65437	1.31489	2.40182	1.69953
DNA meth	DNMT3A	1788	3566.19	1881.09	4013.68	2410.12	1407.54	1620.03	729.94	1745.17	1189.68	429.69	2.53363	1.33644	2.85156	1.71229
DNA meth	DNMT3B	1789	435.59	207	827.73	505.28	88.09	386.22	181.77	1606.68	479.66	33.66	4.94483	2.34987	9.39641	5.73595
DNA meth	MBD1	4152	2904.56	2384.87	3550.97	3101.99	2683.08	1400.82	647.59	1204.55	1080.8	308.1	1.08255	0.888855	1.32347	1.15613
DNA meth	MBD2	8932	3372.68	3452.25	4972.99	4997.1	4074.68	1039.56	1134.56	1753.78	1912.29	516.42	0.827717	0.847244	1.22046	1.22638
DNA meth	MBD3	53615	2849.75	2753.84	3791.07	3482.37	3173.64	1386.93	1162.64	1633.01	1477.16	786.24	0.897944	0.867723	1.19455	1.09728
DNA meth	MBD4	8930	2122.55	2067.64	2791.28	2410.54	1811.79	757.82	838.66	936.62	705.62	253.95	1.17152	1.14121	1.54062	1.33047
DNA meth	MBD5	55777	863.38	798.52	796.71	682.81	921.37	301.59	419.75	284.52	235.89	182.85	0.937061	0.866666	0.864701	0.741081
DNA meth	MBD6	114785	4231.75	2938.56	4952.35	3780.3	2972.13	2519.32	1525.64	1872.99	1544.51	749.19	1.42381	0.988705	1.66626	1.27192
DNA meth	MECP2	4204	3084.7	2914.55	3043.39	2519.17	3867.77	1135.45	1181.43	1046.59	871.56	782.66	0.79754	0.753548	0.786859	0.651324
DNA meth	TET1	80312	231.24	129.55	310.35	181.38	63	256.89	256.17	329.64	167.23	29.53	3.67048	2.05635	4.92619	2.87905
DNA meth	TET2	54790	1650.57	1359.01	1815.37	1681.03	1609.27	983.67	1059.09	818.81	691.35	436.3	1.02566	0.844488	1.12807	1.04459
DNA meth	TET3	200424	2199.68	1378.99	4603.17	3046.58	1486.01	943.21	675.47	1924.2	1668.37	448.27	1.48026	0.927982	3.09767	2.05017
DNA meth	UHRF1	29128	850.57	765.54	1663.2	1167.34	87.11	659.27	713.43	973.02	633.54	70.94	9.76432	8.7882	19.0931	13.4008
K demeth	JARID2	3720	1623.69	1170.52	3066.04	2572.5	1162.49	671.76	701.04	1562.15	1223.44	234.33	1.39673	1.00691	2.63748	2.21292
K demeth	JMJD1C	221037	3397.96	3069.74	2632.94	2118.86	4633.37	1708.76	2570.51	2191.05	864.16	2070.56	0.733367	0.662529	0.568256	0.457304
K demeth	JMJD1C-AS1	84989	94.94	56.65	25.85	23.77	28.87	206.93	64.03	35.17	20.94	12.64	3.28853	1.96224	0.895393	0.823346
K demeth	JMJD4	65094	946.78	864.2	1045.52	885.16	552.82	464.15	380.34	401.79	341.81	131.92	1.71264	1.56326	1.89125	1.60117
K demeth	JMJD6	23210	1542.41	1405.08	1469.51	1491.29	1380.36	553.21	477.17	541	524.72	548.65	1.1174	1.01791	1.06458	1.08036
K demeth	JMJD7	100137047	13.24	9.21	31.65	23.19	11.25	10.13	10.43	30.64	15.9	8.38	1.17689	0.818667	2.81333	2.06133
K demeth	JMJD7-PLA2G4B	8681	296.74	168.08	598.53	360.5	236.69	208.89	150.28	504.22	317.36	141.38	1.25371	0.710127	2.52875	1.52309
K demeth	JMJD8	339123	2220.62	2313.57	1914.54	2235.21	2219.67	1076.31	1071.45	760.6	729.98	456.5	1.00043	1.0423	0.862534	1.007
K demeth	KDM1A	23028	5152.36	4109.3	6394.61	5487.14	2868.22	2157.45	1611.7	3556.02	1576.41	263.93	1.79636	1.4327	2.22947	1.91308
K demeth	KDM1B	221656	1751.57	1381.22	2226.61	1764.55	1291.34	764.66	502.15	952.74	978.42	273.94	1.3564	1.0696	1.72426	1.36645
K demeth	KDM2A	22992	8989.01	7224.89	8456.84	7549.07	6935.07	2753.64	2558.49	2841.62	2766.3	1610.66	1.29617	1.04179	1.21943	1.08854
K demeth	KDM2B	84678	1648.88	1338.45	2501.54	1884.09	1661.17	548.14	430.55	976.97	849.11	305.31	0.992602	0.805727	1.50589	1.13419
K demeth	KDM3A	55818	3547.89	3124.91	5850.59	4635.65	2668.12	1370.29	1069.25	2394.97	2228.1	523.61	1.32973	1.1712	2.19278	1.73742
K demeth	KDM3B	51780	5409.54	4359.17	4703.77	3374.48	5018.02	1586.06	1405.8	1551.44	1006.72	849.66	1.07802	0.868703	0.937376	0.672472
K demeth	KDM4A	9682	2793.71	2266.5	3672.57	3227.04	2646.64	921.55	650.81	1800.81	1370.33	527.61	1.05557	0.856369	1.38763	1.2193
K demeth	KDM4B	23030	2121.87	1893.33	2701.4	2317.82	2088.94	732.34	745.62	1053.21	1064.59	453.2	1.01576	0.906359	1.29319	1.10957
K demeth	KDM4C	23081	662.91	659.31	669.74	669.86	810.2	328.98	334.13	295.12	257.04	102.16	0.818205	0.813762	0.826635	0.826784
K demeth	KDM4D	55693	81.06	70.44	113.16	79.26	55.87	43.32	36.75	53.74	41.9	18.17	1.45087	1.26078	2.02542	1.41865
K demeth	KDM4E	390245	2.01	1.52	4.92	3.02	1.18	4.68	4.32	16.7	8.48	1.36	1.70339	1.28814	4.16949	2.55932
K demeth	KDM5A	5927	3580.11	3002.41	4580.63	3966.15	3294.9	1853.87	1349.6	1778.56	1950.55	587.87	1.08656	0.911229	1.39022	1.20372
K demeth	KDM5B	10765	7773.73	4439.85	8035.34	6011.55	2906.39	3048.85	1564.95	3485.85	2182.57	599.26	2.6747	1.52762	2.76471	2.06839
K demeth	KDM5C	8242	7375.64	5515.36	7560.88	6376.58	4913.48	2921.04	2062.17	2753.78	2825.14	1167.15	1.5011	1.1225	1.5388	1.29777
K demeth	KDM5D	8284	1059.02	701.11	1095.46	955.44	1149.39	1650.72	1158.25	1379.15	1090.87	1120.68	0.921376	0.609984	0.953079	0.831258
K demeth	KDM6A	7403	1759.87	1542.31	1786.38	1470.74	1576.21	898.05	717.65	709.85	562.48	420.41	1.11652	0.978493	1.13334	0.933086
K demeth	KDM6B	23135	3318.37	2259.19	2954	2887.41	6097.41	1380.53	1085.67	1265.94	1982	5775.63	0.544226	0.370516	0.484468	0.473547
K demeth	KDM7A	80853	2084.39	1920.94	2037.38	2004.89	2055.86	1134.89	1421.96	1113.01	1041.55	651.18	1.01388	0.934373	0.991011	0.975207
K demeth	KDM7A-DT	100134229	361.34	485.71	565.7	779.74	286.37	293.76	333.37	512.91	608.21	177.76	1.26179	1.69609	1.97542	2.72284
K demeth	KDM8	79831	186.97	209.93	202.03	177.52	231.26	62.51	67.87	171.2	71.29	55.18	0.808484	0.907766	0.873605	0.767621
K demeth	PHF8	23133	2813.92	1902.23	3682.33	2463.65	1770.82	1308.52	1044.7	2087.11	1420.49	328.37	1.58905	1.07421	2.07945	1.39125
K meth	ASH1L	55870	6641.85	3247.28	5539.5	2899.09	3993.66	3482.31	2587.67	2009.94	1074.96	1082.15	1.6631	0.813109	1.38707	0.725923
K meth	DOT1L	84444	1724.7	1302.14	2541.12	2002.3	2437.66	793.31	800.81	1152.66	1206.52	1358.99	0.707523	0.534176	1.04244	0.821402
K meth	EHMT1	79813	3235.36	2301.41	3920.77	2840.48	2550.22	1018.97	816.36	1360.14	1162.36	481.57	1.26866	0.902436	1.53742	1.11382
K meth	EHMT2	10919	4885.83	2705.04	4936.27	3392.08	2303.19	1976.1	906.98	2059.38	1414.97	538.32	2.12133	1.17448	2.14323	1.47277
K meth	EZH1	2145	1829.36	1472.22	1657.14	1194.5	2514.57	631.31	499.5	609.62	531	543.19	0.727504	0.585476	0.659015	0.475032
K meth	EZH2	2146	1414.75	875.45	2156.64	1479	195.52	1052.31	631.86	1177.57	985.1	92.71	7.23583	4.47755	11.0303	7.56444
K meth	KMT2A	4297	4530.79	3696.7	4010.98	3045.8	4286.82	1829.76	2534.67	1446	1316.06	1261.85	1.05691	0.862341	0.935654	0.710503
K meth	KMT2B	9757	4319.8	2877.62	5682.82	3593.21	2547.82	1727.52	1494.86	3063.97	1634.62	680.46	1.69549	1.12944	2.23046	1.41031
K meth	KMT2C	58508	5785.62	4109.84	4085.96	3257.53	4810.14	3495.27	3718.88	1621.66	1411.68	1380.39	1.2028	0.854412	0.849447	0.677221
K meth	KMT2D	8085	7272.69	4065.67	6393.42	4556.67	6288.69	2791.86	2059.3	2265.78	2444.97	2090.66	1.15647	0.646505	1.01665	0.724582
K meth	KMT2E	55904	4805.23	4016.42	4074.64	3498.63	5340.05	1948.51	2115.17	1416.43	1217.32	1409.95	0.899847	0.752132	0.763034	0.655168
K meth	KMT5A	387893	1550.04	1225.82	2649.69	2452.37	1299.43	508.09	422.17	1022.3	1045.41	179.09	1.19286	0.943352	2.03912	1.88727
K meth	KMT5B	51111	3500.88	2412.22	2885.86	2477.12	2600.18	1075.3	802.54	1840.26	937.87	388.02	1.3464	0.927713	1.10987	0.952673
K meth	KMT5C	84787	658.88	480.86	813.39	759.28	326.57	403.08	318.95	469.49	659.51	116.74	2.01758	1.47246	2.49071	2.32501
K meth	NSD1	64324	4187.01	3280.38	4582.4	3528.74	3708.48	1560.26	1436.83	1493.2	1805.51	927.38	1.12904	0.884562	1.23565	0.951533
K meth	PRDM2	7799	2610.86	2474.23	2734.07	2509.99	3187.67	839.94	1001.12	1047.43	850.29	680.25	0.81905	0.776188	0.857702	0.787406
K meth	SETBP1	26040	835.47	575.62	1135.14	807.62	1330.68	1099.54	630.37	927.61	503.64	544.96	0.627852	0.432576	0.853053	0.606923
K meth	SETD1A	9739	2409.56	1796.39	2810.85	2043.83	1773.88	888.58	707.02	992.42	751.18	424.01	1.35836	1.01269	1.58458	1.15218
K meth	SETD1B	23067	2504.02	1777.3	2818.13	2036.44	2043.19	882.69	631.1	967.09	791.82	496.97	1.22554	0.869865	1.37928	0.996696
K meth	SETD2	29072	3646.71	2968.92	3173.54	2734.48	3992.19	1067.8	1452.59	768.36	961.03	872.11	0.913461	0.743682	0.794937	0.684957
K meth	SETD3	84193	3250.87	3261.93	2875	3425.99	4564.71	1060.93	959.2	1289.68	1193.02	600.88	0.712174	0.714597	0.629832	0.750538
K meth	SETD4	54093	1017.15	817.16	999.02	806.09	692.74	519.47	347.51	401.49	316.63	157.97	1.4683	1.17961	1.44213	1.16363
K meth	SETD5	55209	6065.44	4280.05	5645.38	4728.04	4194.97	1948.04	1627.94	1671.89	1718.58	927.32	1.44588	1.02028	1.34575	1.12707
K meth	SETD6	79918	911.29	602.82	889.43	662.47	448.67	394.21	221.42	401.18	259.67	68.51	2.03109	1.34357	1.98237	1.47652
K meth	SETD7	80854	5083.16	5296.63	3838.6	3965.88	5073.88	2971.78	2185.25	1805.63	1827.5	1076.45	1.00183	1.0439	0.756541	0.781627
K meth	SETD9	133383	247.17	339.86	242.05	297.15	241.7	117.1	258.09	140.86	199.58	96.97	1.02263	1.40612	1.00145	1.22942
K meth	SETDB1	9869	4211.39	1560.75	3693.62	1467.71	1678.56	1743.46	197.98	1250.68	174.38	248.43	2.50893	0.929815	2.20047	0.874386
K meth	SETDB2	83852	723.99	749.12	584.7	606.87	948.63	343.03	309.54	284.01	218.48	220.61	0.763195	0.789686	0.616363	0.639733
K meth	SMYD3	64754	623.47	576.96	628.46	488.46	311.92	391.76	451.82	557.34	246.16	69.11	1.99881	1.84971	2.01481	1.56598
PRC	ASXL1	171023	4446.93	3265.4	4486.55	3621.04	4054.71	1350.67	1030	3721.22	1808.06	936.14	1.09673	0.805335	1.1065	0.893045
PRC	BAP1	8314	3639.56	3544.89	4498.84	4433.76	3853.32	1038.83	988.34	1738.74	1688.32	564.79	0.944526	0.919957	1.16752	1.15063
PRC	BMI1	648	2486.05	2515.04	2144.85	2348.69	2104.37	1555.98	1121.27	893.33	1244.17	510.06	1.18137	1.19515	1.01924	1.1161
PRC	BRMS1	25855	2472.09	2646.47	2771.25	3315.14	1775.93	924.91	1161.25	1296.57	1588.72	346.71	1.392	1.49019	1.56045	1.86671
PRC	CBX1	10951	4579.28	3670.74	6577.19	4516.95	2267.96	2213.24	1437.35	2948.24	2051.29	341.87	2.01912	1.61852	2.90005	1.99164
PRC	CBX2	84733	1295.08	473.18	2844.24	1365.87	180.03	1262.81	523.72	2246.06	1255.13	118.98	7.19369	2.62834	15.7987	7.5869
PRC	CBX3	11335	11560.7	11328.1	10946.1	10533	5014.45	4659.54	5915.38	3381.26	5074.74	1162.68	2.30547	2.25908	2.18291	2.10053
PRC	CBX3P2	645158	38.37	32.19	61.45	38.26	33.06	25.42	21.34	45.69	27.25	12.38	1.16062	0.973684	1.85874	1.15729
PRC	CBX4	8535	2381.51	1910.59	2018.8	1791.22	1008.29	1092.29	983.09	1129.94	805.55	246.31	2.36193	1.89488	2.0022	1.77649
PRC	CBX5	23468	7212.38	5238.39	7017.1	4677.5	4799.08	3653.24	2656.11	4067.32	2251.67	1078.32	1.50287	1.09154	1.46218	0.974666
PRC	CBX6	23466	2737.77	3583.28	4832.59	5530.49	4785.77	1792.41	2760.82	2825.18	3407.3	1288.75	0.572065	0.748736	1.00978	1.15561
PRC	CBX7	23492	951.12	1387.68	1070.98	1130.91	4016.27	497.29	764.07	512.95	739.89	1009.92	0.236817	0.345515	0.26666	0.281582
PRC	CBX8	57332	753.12	571.92	668.79	547.34	241.79	389.82	266.54	355.67	269.15	80.8	3.11477	2.36536	2.766	2.2637
PRC	EED	8726	1074.25	1064.77	1238.97	1250.06	667.61	394.94	362.32	435.8	532.1	127.5	1.6091	1.5949	1.85583	1.87244
PRC	MAD1L1	8379	1721.38	1786.81	1621.72	1711.37	1415.42	789.76	1483.1	1172.85	988.82	340.36	1.21616	1.26239	1.14575	1.20909
PRC	MAPKAP1	79109	3799.99	3846.99	4861.29	4671.11	3952.08	1025.9	1037.85	1543.58	1585.51	446.67	0.961516	0.973409	1.23006	1.18194
PRC	MTF2	22823	1544.12	1224.48	1277.18	1222.78	1004.93	681.81	591.03	486.26	484.42	178.91	1.53654	1.21847	1.27091	1.21678
PRC	NCOR2	9612	15429.4	11435.8	10734.3	9635.98	15474.3	6841.92	5110.51	4924.19	5179.97	4377.38	0.997098	0.739016	0.693686	0.622708
PRC	OGT	8473	11753.1	7501.97	7142.66	6724.71	5899.92	7653.14	4570.67	3293.37	11491.1	2400.33	1.99207	1.27154	1.21064	1.1398
PRC	PCGF2	7703	2710.86	2165.2	2134.99	1769.99	1678.59	1424.18	975.8	1108.26	654.39	396.81	1.61496	1.28989	1.27189	1.05445
PRC	PCGF3	10336	3436.84	2705.68	3081.68	2717.13	1921.48	1343.85	956.11	2600.55	888.54	477.93	1.78864	1.40812	1.60381	1.41408
PRC	PCGF5	84333	2900.37	3154.92	2401.41	2512.14	4114.27	1708.96	1713.05	1461.6	1270.91	989.69	0.704954	0.766824	0.583678	0.610592
PRC	PCYOX1	51449	6401.25	5801.24	5474.4	6309.09	13215.1	2961.71	2411.11	2553.99	2750.28	4223.33	0.484389	0.438986	0.414253	0.477415
PRC	PHC1	1911	481.29	394.1	575.21	384.71	539.39	286.05	201.27	424.51	201.88	111.28	0.892286	0.73064	1.06641	0.713232
PRC	PHC2	1912	7477.01	9565.87	4863.26	5637.75	7337.23	2878.16	3554.01	2751.58	2202.74	2748.12	1.01905	1.30374	0.66282	0.768376
PRC	PHC3	80012	2414.9	2171.42	3304.8	2591.59	2333.81	1889.32	2991.81	1639.49	1083.24	606.34	1.03475	0.930419	1.41605	1.11045
PRC	PHF19	26147	1579.08	1752.4	1687.09	1532.12	1083.21	931.35	876.83	720.96	731.32	323.98	1.45778	1.61778	1.55749	1.41443
PRC	RBBP4	5928	9755.01	8945.11	9306.32	8002.74	6394.09	3520.84	2793.82	6065.85	2578.97	821.97	1.52563	1.39897	1.45546	1.25158
PRC	RING1	6015	2692.53	2293.11	2436.83	2566.7	2378.07	1078.55	688.67	867.93	936.58	448.56	1.13223	0.964274	1.02471	1.07932
PRC	RYBP	23429	2872.4	2744.21	1985.48	2208.38	4052.79	1440.67	946.33	603.74	652.95	1460.61	0.708746	0.677116	0.489904	0.544904
PRC	SCMH1	22955	2279.38	1702.33	1652.92	1405.13	2080.69	1317.35	538.78	890.26	477.16	326.02	1.09549	0.818156	0.79441	0.675319
PRC	SFMBT1	51460	798.33	695.92	730.65	634.29	685.99	460.21	350.26	314.61	252.1	143.87	1.16376	1.01448	1.0651	0.924634
R meth	PRMT1	3276	5356.47	5849.95	9020.55	10024.5	4382.78	2156.74	2816.91	3828.61	4125.68	1050.95	1.22216	1.33476	2.05818	2.28726
R meth	PRMT2	3275	3620.13	4438.34	3899.19	4203.84	4796.57	1070.82	1132.52	1657.41	1355.16	493.7	0.754733	0.925315	0.812912	0.876426
R meth	PRMT3	10196	922	882.12	1294.6	1279.18	475.89	428.3	398.78	617.59	627.64	87.26	1.93742	1.85362	2.72038	2.68797
R meth	PRMT5	10419	3032.66	2642.32	3579.86	3771.27	1738.44	1417.11	1279.9	1504.54	3138.74	291.58	1.74447	1.51994	2.05924	2.16934
R meth	PRMT5-AS1	100505758	25.6	14.09	19.45	18.54	8.46	22.45	10.27	14.06	18.91	5.32	3.026	1.66548	2.29905	2.19149
R meth	PRMT6	55170	730.89	885.22	1160.23	1189.17	667.72	527.59	395.21	608.59	820.54	189.08	1.09461	1.32574	1.7376	1.78094
R meth	PRMT7	54496	1475.46	1367.87	1579.56	1393.94	1078.57	579.66	446.87	534.35	479.95	174.57	1.36798	1.26823	1.46449	1.2924
R meth	PRMT8	56341	115.21	40.07	24.04	63.03	122.74	181.95	64.69	70.46	185.38	157.71	0.938651	0.326462	0.195861	0.513525
R meth	PRMT9	90826	488.46	527.18	442.15	481.54	626.84	182.65	161.19	129.54	184.28	145.67	0.779242	0.841012	0.705363	0.768202
Ubiquit	RNF168	165918	1105.71	962.87	3476.62	2883.55	1119.29	976.5	491.52	2622.87	1812.26	223.65	0.987867	0.860251	3.10609	2.57623
Ubiquit	RNF20	56254	2404.59	2146.77	3226.86	2432.26	2721.76	657.71	660.63	1046.24	968.4	477.16	0.883469	0.788743	1.18558	0.893635
Ubiquit	RNF24	11237	2053.17	2120.34	2263.03	2158.61	1844.58	1150.15	1216.49	1274.85	996.09	463.51	1.11308	1.1495	1.22685	1.17024
Ubiquit	RNF31	55072	1211.06	933.91	1200.32	1051.82	987.83	409.1	314.68	620.84	354.18	208.34	1.22598	0.945416	1.21511	1.06478
Ubiquit	RNF32	140545	204.53	196.19	176.68	174.24	125.87	160.97	131.57	92.62	108.43	48.89	1.62493	1.55867	1.40367	1.38429
Ubiquit	RNF34	80196	1698.17	1549.77	1731.46	1581	1056.96	526.01	495.27	500.72	365.25	124.29	1.60665	1.46625	1.63815	1.4958
Ubiquit	RNF38	152006	2095.36	1907.45	2493.06	1749.14	3353.6	930.17	929.57	1777.12	771.84	727.45	0.624809	0.568777	0.743398	0.521571
Ubiquit	RNF39	80352	386.77	442.42	241.46	344.69	186.03	425.06	427.18	248.45	246.53	84.47	2.07907	2.37822	1.29796	1.85287
Ubiquit	RNF40	9810	3796.47	3220.14	3889.84	3132.51	2967.76	1316.28	1349.45	1977.2	1116.17	693.83	1.27924	1.08504	1.3107	1.05551
*** Paired-sample t-test
Category	ADC, high vs low	SCC, high vs low	SETDB1-high, ADC vs SSC	SETDB1-low, ADC vs SSC
acetylation	0.0483025	0.0149616	0.121174	0.234823
Deacetylation	0.152425	0.425004	0.744487	0.45449
DNA methylation	0.0127284	0.0271867	0.065957	0.0377107
lysine demethylation	0.000200861	0.000680975	0.0480351	0.00585538
lysine methylation	0.000489623	0.00297395	0.263137	0.130623
PRC	0.0538131	0.143269	0.377908	0.349375
arg methylation	0.266628	0.295975	0.5197	0.01615
Ubiquit ination	0.241467	0.244449	0.490956	0.534924
